# Supplementary material
Source: PubMed Central journal article supplement (PMC3208135)
Supplement: NIHMS323995-supplement-1.pdf [file NIHMS323995-supplement-1.pdf]

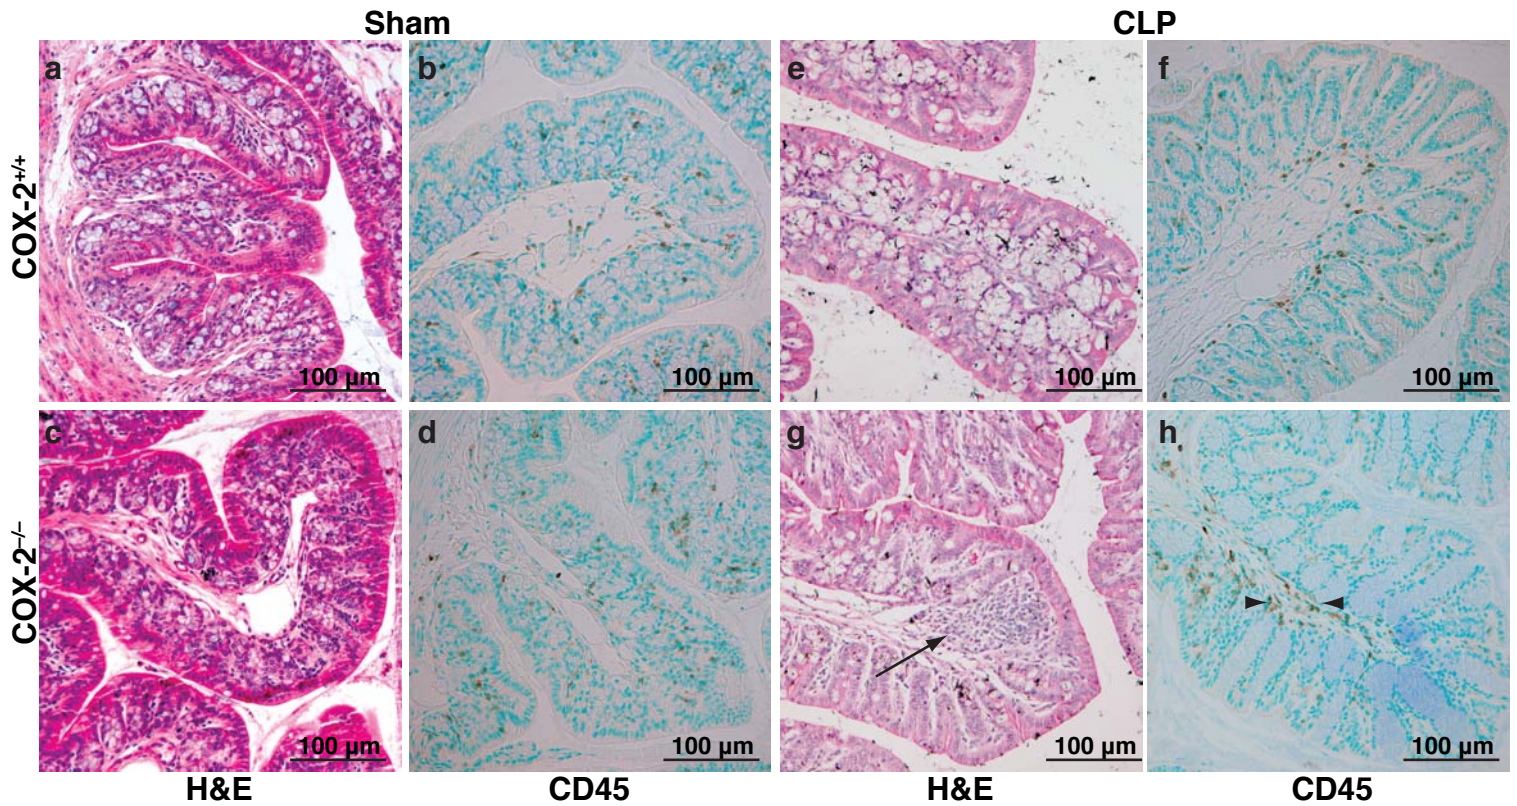

**Supplemental Figure 1. COX-2 deficient mice have increased colonic inflammation following peritonitis-induced polymicrobial sepsis.** COX-2<sup>+/+</sup> and COX-2<sup>-/-</sup> mice underwent CLP with a 19-g needle (1 hole). Colons were harvested 48 h following CLP. Representative H&E staining and immunostaining for CD45 in COX-2<sup>+/+</sup> (top) and COX-2<sup>-/-</sup> (bottom) mice following sham surgery (left) and CLP (right). Arrow indicates inflammatory infiltrate and arrowheads indicate cells staining positive for CD45 in colonic villi of COX-2<sup>-/-</sup> mice following CLP. Scale bar is 100 μm. Magnification 100×.

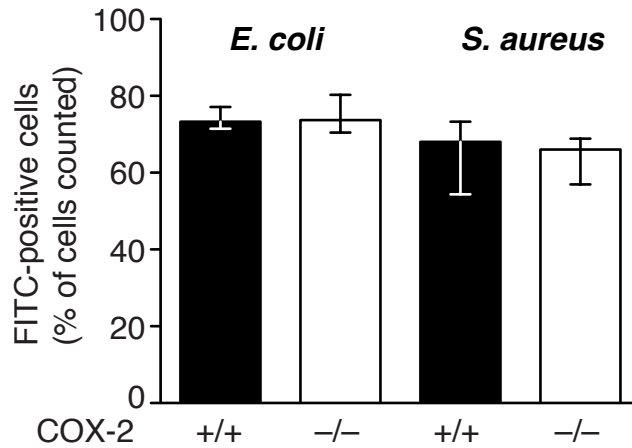

**Supplemental Figure 2. COX-2 deficiency does not impair bacterial phagocytosis by peritoneal neutrophils.** FITC-labeled *E. coli* or *S. aureus* was injected into the peritoneum of COX-2<sup>+/+</sup> (n=4-5 per group) and COX-2<sup>-/-</sup> mice (n=4-5 per group) in two independent experiments. Neutrophils were isolated after 24 h and phagocytosis assessed by flow cytometry. There was no difference in phagocytosis of either *E. coli* or *S. aureus* between COX-2<sup>+/+</sup> and COX-2<sup>-/-</sup> mice. Data represent median  $\pm$  IQR from two independent experiments.

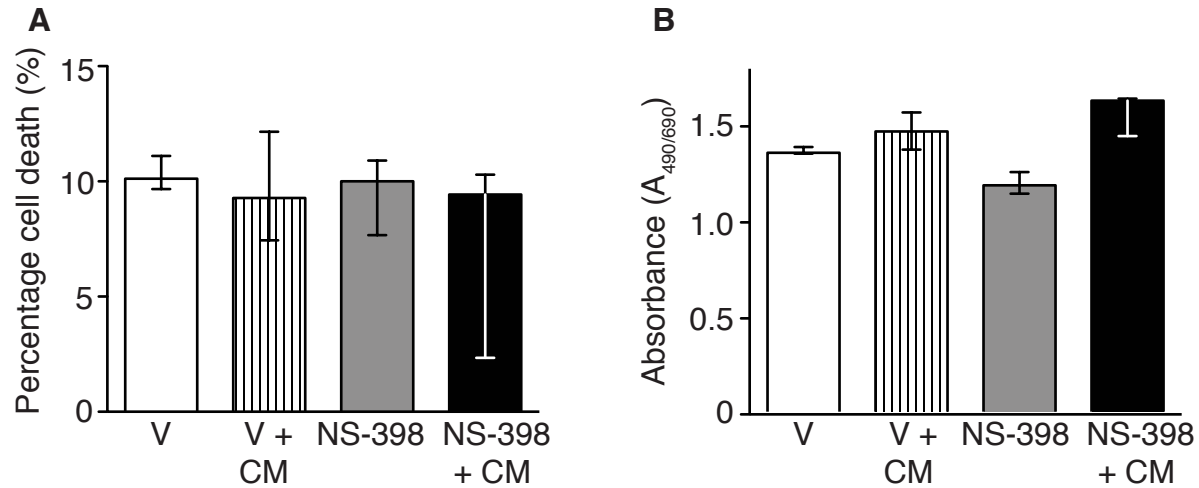

**Supplemental Figure 3. Selective inhibition of COX-2 does not lead to decreased cell viability in cytomix-stimulated intestinal epithelial cells.** C2BBE1 cells were treated with vehicle or NS-398 and stimulated with cytomix (CM: IFN- $\gamma$  1000 U/ml, TNF- $\alpha$  10 ng/ml, IL-1 $\beta$  1 ng/ml) in collagen-coated transwells. **(A)** Following 48 h, cells were incubated with 0.4% trypan blue, lysed with 1% SDS, and absorbance measured at 590 nm. Results were normalized to a positive control (KCN). **(B)** The amount of LDH released into the basolateral media was measured via a commercial *in vitro* toxicology assay kit (TOX7, Sigma). Data represent median  $\pm$  IQR for at least two independent experiments performed in triplicate.

**Supplemental Table I. Fredenburgh et al.**

**Supplemental Table I.** Circulating cytokine levels in COX-2<sup>+/+</sup> and COX-2<sup>-/-</sup> mice following CLP.

|                            |                 | Time after CLP    |                                 |                                    |
|----------------------------|-----------------|-------------------|---------------------------------|------------------------------------|
|                            | <b>Cytokine</b> | <b>sham (n=6)</b> | <b>12 h (n=4)</b>               | <b>24 h (n=4)</b>                  |
| <b>COX-2<sup>+/+</sup></b> | IFN- $\gamma$   | ND                | 11.6 (7.8, 11.6)                | 9.2 (3.3, 14.2)                    |
|                            | IL-6            | 56 (11.7, 193)    | 2417 (2402, 4803) <sup>‡</sup>  | 1316 (661, 3304) <sup>‡</sup>      |
|                            | KC              | 98 (62, 151)      | 13841 (186, 36101) <sup>‡</sup> | 43133 (15878, 109249) <sup>‡</sup> |
|                            | IL-18           | 174 (146, 306)    | 278 (145, 333)                  | 50 (46, 96) <sup>‡</sup>           |
|                            | IL-1 $\beta$    | 3.1 (3.1, 60)     | 3.1 (1.6, 3.1)                  | 3.1 (3.1, 3.1)                     |
|                            | IL-10           | 1.6 (1.3, 6.3)    | 68 (34, 234) <sup>‡</sup>       | 12 (4.8, 25.2)                     |
|                            | IL-12p40        | 3.4 (0.4, 14)     | 107 (18, 190) <sup>‡</sup>      | 48 (15, 60)                        |
|                            | MIP2 (CXCL2)    | ND                | 659 (537, 826) <sup>‡</sup>     | 99.7 (72, 336) <sup>‡</sup>        |
|                            | TNF- $\alpha$   | ND                | 8.4 (3.1, 14.7)                 | 7.3 (3.3, 15) <sup>‡</sup>         |
|                            |                 |                   |                                 |                                    |
|                            | <b>Cytokine</b> | <b>sham (n=6)</b> | <b>12 h (n=6)</b>               | <b>24 h (n=5)</b>                  |
| <b>COX-2<sup>-/-</sup></b> | IFN- $\gamma$   | ND                | 23.1 (8.5, 33.9) <sup>‡</sup>   | 33.8 (21.8, 187.9) * <sup>‡</sup>  |
|                            | IL-6            | 86 (11, 326)      | 4588 (1375, 9460) <sup>‡</sup>  | 8170 (4931, 531774) * <sup>‡</sup> |
|                            | KC              | 129 (108, 247)    | 20854 (424, 50227) <sup>‡</sup> | 21703 (11094, 23399) <sup>‡</sup>  |
|                            | IL-18           | 231 (141, 356)    | 143 (67, 297)                   | 143 (131, 253)                     |
|                            | IL-1 $\beta$    | ND                | 4 (3.1, 5.1)                    | 42 (3.1, 77)                       |
|                            | IL-10           | 1.6 (1.4, 10.5)   | 276 (103, 333) <sup>‡</sup>     | 78 (64, 7196) * <sup>‡</sup>       |
|                            | IL-12p40        | 3.4 (1.9, 16.8)   | 874 (437, 1487) * <sup>‡</sup>  | 1184 (196, 3474) * <sup>‡</sup>    |
|                            | MIP2 (CXCL2)    | ND                | 1262 (486, 7300) <sup>‡</sup>   | 1146 (655, 34042) * <sup>‡</sup>   |
|                            | TNF- $\alpha$   | ND                | 54 (41, 106) * <sup>‡</sup>     | 44.4 (35, 215) * <sup>‡</sup>      |
|                            |                 |                   |                                 |                                    |

\* p < 0.05 vs. COX-2<sup>+/+</sup> CLP by the Mann-Whitney test

<sup>‡</sup> p < 0.05 vs. sham by the Mann-Whitney test

ND – not detected

Data are presented as median (IQR)
